# Supplementary material for: Delivery of thrombolytic therapy using rod-shaped plant viral nanoparticles decreases the risk of hemorrhage
Source: Royal Society of Chemistry journal article supplement (doi:10.1039/c8nr02861c), 2018-01-01
Supplement: c8nr02861c1.pdf [file c8nr02861c1.pdf]

Supporting Information

## Delivery of thrombolytic therapy using rod-shaped plant viral nanoparticles decreases risk of hemorrhage

Andrzej S. Pitek,<sup>a</sup> Jooneon Park,<sup>a</sup> Yunmei Wang,<sup>b</sup> Huiyun Gao,<sup>b</sup> He Hu,<sup>a</sup> Daniel I. Simon,<sup>b</sup> and Nicole F. Steinmetz.<sup>acdef\*\*</sup>

<sup>a</sup> Department of Biomedical Engineering, Case Western Reserve University, Cleveland, OH 44106, USA

<sup>b</sup> Harrington Heart and Vascular Institute, Case Cardiovascular Research Institute, Department of Medicine, University Hospitals Case Medical Center and Case Western Reserve University School of Medicine, Cleveland, OH 44106, USA

<sup>c</sup> Department of Radiology, Case Western Reserve University, Cleveland, OH 44106, USA

<sup>d</sup> Department of Materials Science and Engineering, Case Western Reserve University, Cleveland, OH 44106, USA

<sup>e</sup> Department of Macromolecular Science and Engineering, Case Western Reserve University, Cleveland, OH 44106, USA

<sup>f</sup> Case Comprehensive Cancer Center, Division of General Medical Sciences-Oncology, Case Western Reserve University, Cleveland, OH 44106, USA

<sup>#</sup>present address: Department of NanoEngineering, Moores Cancer Center, University of California San Diego, La Jolla, CA 92093, USA

\*nsteinmetz@ucsd.edu

### CONTENTS

- I. Figure S1. UV-vis spectrum of TMV-tPA
- II. Table S1. Densitometric analysis for the determination of tPA loading on TMV

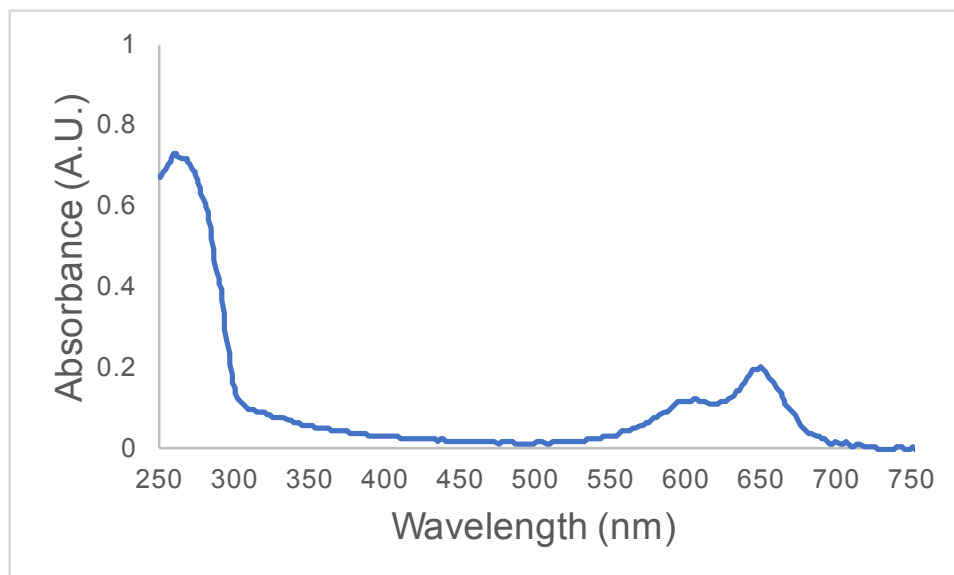

**Figure S1.** UV-vis spectrum of TMV-tPA. Based on ratio between the absorbance at 646 nm ( $\lambda_{\max}$  of sCy5) and 260 nm ( $\lambda_{\max}$  of TMV), it is determined that  $108.6 \pm 11.8$  sCy5 molecules were conjugated to one TMV particle on average.

**Table S1.** Densitometric analysis for the determination of tPA loading.

|                | Band density [AU]   |                     |           | Fitting equation       | $\mu\text{g tPA} / 20 \mu\text{g TMV}^*$ | $\mu\text{g tPA} / \text{mg TMV}$ | Number of tPA/TMV** |
|----------------|---------------------|---------------------|-----------|------------------------|------------------------------------------|-----------------------------------|---------------------|
|                | tPA 1 $\mu\text{g}$ | tPA 5 $\mu\text{g}$ | TMVcp-tPA |                        |                                          |                                   |                     |
| Batch 1        | 4890.12             | 21621.18            | 4965.09   | $y=0.0002*x$           | 0.993                                    | 49.651                            | 27.946              |
| Batch 2        | 5733.46             | 23046.64            | 12838.65  | $y=0.0002*x$           | 2.568                                    | 128.386                           | 72.263              |
| Batch 3        | 8599.41             | 28088.54            | 14702.71  | $y=0.0002*x$           | 2.941                                    | 147.027                           | 82.755              |
| Batch 4        | 8659.19             | 23928.87            | 14377.45  | $y = 0.0003*x - 1.268$ | 3.044                                    | 152.246                           | 85.693              |
| Batch 5        | 8070.77             | 23826.47            | 16351.43  | $y = 0.0003*x - 1.049$ | 3.854                                    | 192.821                           | 108.531             |
| Batch 6        | 8070.77             | 23826.47            | 14494.36  | $y = 0.0003*x - 1.049$ | 3.299                                    | 164.965                           | 92.852              |
| Batch 7        | 10188.02            | 19865.11            | 12712.88  | $y = 0.0004*x - 3.211$ | 1.874                                    | 93.698                            | 52.738              |
| Batch 8        | 10188.02            | 19865.11            | 16761.13  | $y = 0.0004*x - 3.211$ | 3.493                                    | 174.663                           | 98.310              |
| <b>Average</b> |                     |                     |           |                        |                                          |                                   | 77.64               |
| <b>SD</b>      |                     |                     |           |                        |                                          |                                   | 26.25               |

\* calculated using the fitting equation

\*\* calculated using  $MW_{\text{tPA}} = 57 \text{ kDa}$  and  $MW_{\text{TMV}} = 39400 \text{ kDa}$
